# Supplementary material for: Development of a Genome-Scale Metabolic Model of Clostridium thermocellum and Its Applications for Integration of Multi-Omics Datasets and Computational Strain Design
Source: PubMed Central journal article supplement (PMC7471609; doi:10.3389/fbioe.2020.00772), 2020-08-21
Supplement: Data_Sheet_3.pdf [file Data_Sheet_3.pdf]

## Supplementary Material 3:

### Development of a Genome-Scale Metabolic Model of *Clostridium thermocellum* and its Applications for Integration of Multi-Omics Datasets and Computational Strain Design

Sergio Garcia<sup>1,2</sup>, R. Adam Thompson<sup>2,3,6</sup>, Richard J. Giannone<sup>2,5</sup>, Satyakam Dash<sup>2,4</sup>, Costas D. Maranas<sup>2,4</sup>, and Cong T. Trinh<sup>1,2,3,\*</sup>

<sup>1</sup>*Department of Chemical and Biomolecular Engineering, The University of Tennessee, Knoxville, TN, USA.*

<sup>2</sup>*Center for Bioenergy Innovation, Oak Ridge National Laboratory, Oak Ridge, TN, USA.*

<sup>3</sup>*Bredesen Center for Interdisciplinary Research and Graduate Education, The University of Tennessee, Knoxville and Oak Ridge National Laboratory, Oak Ridge, TN, USA.*

<sup>4</sup>*Department of Chemical Engineering, The Pennsylvania State University, University Park, PA, USA.*

<sup>5</sup>*Chemical Sciences Division, Oak Ridge National Laboratory, Oak Ridge, TN, USA.*

<sup>6</sup>*Current affiliation: Quantitative Translational Pharmacology, DMPK-BA, Abbvie Inc., North Chicago, IL, USA.*

*\* Corresponding author: 1512 Middle Dr, DO432, Department of Chemical and Biomolecular Engineering, University of Tennessee, Knoxville, TN 37996, USA. Tel: 865-974-2181. Email: ctrinh@utk.edu*

Table S1: A list of 70 consistent reactions in the  $\Delta hydG\Delta ech$  case study and their associated fold changes. The biomass reaction is not included due to size. Note that this table is continued in the following pages.

| ID          | Formula                                                                                                                                      | Fold change       |             |                  |
|-------------|----------------------------------------------------------------------------------------------------------------------------------------------|-------------------|-------------|------------------|
|             |                                                                                                                                              | <i>proteomics</i> | <i>pFBA</i> | <i>FVAcenter</i> |
| MDH         | mal_L.c + nad.c $\leftrightarrow$ h.c + nadh.c + oaa.c                                                                                       | 1.4               | 0.2         | 0.1              |
| PEPCK_re    | co2.c + gdp.c + pep.c $\rightarrow$ gtp.c + oaa.c                                                                                            | 0.9               | 0.1         | 0.1              |
| VOR2b       | 3mob.c + coa.c + 2.0 fdxo_42.c $\rightarrow$ co2.c + 2.0 fdxr_42.c + h.c + ibcoa.c                                                           | 0.9               | 12.3        | 0.8              |
| PFL         | coa.c + pyr.c $\rightarrow$ accoa.c + for.c                                                                                                  | 0.5               | 0.2         | 0.8              |
| FRNDPR2r    | 2.0 fdxr_42.c + h.c + nadh.c + 2.0 nadp.c $\leftrightarrow$ 2.0 fdxo_42.c + nad.c + 2.0 nadph.c                                              | 0.3               | 0.2         | 2.3              |
| ALCD2x      | acald.c + h.c + nadh.c $\rightarrow$ etoh.c + nad.c                                                                                          | 0.1               | 0.8         | 0.6              |
| IBUTCOARx   | h.c + ibcoa.c + nadh.c $\rightarrow$ 2mppal.c + coa.c + nad.c                                                                                | 0.1               | 12.3        | 0.8              |
| ACALD       | accoa.c + h.c + nadh.c $\rightarrow$ acald.c + coa.c + nad.c                                                                                 | 0.1               | 0.8         | 1.1              |
| ALCD23xi    | 2mppal.c + h.c + nadh.c $\rightarrow$ ibutoh.c + nad.c                                                                                       | 0.1               | 12.3        | 0.8              |
| ME2         | mal_L.c + nadp.c $\rightarrow$ co2.c + nadph.c + pyr.c                                                                                       | 0.1               | 0.3         | 0.1              |
| PSCVT       | pep.c + skm5p.c $\rightarrow$ 3psme.c + pi.c                                                                                                 | -0.1              | -0.3        | 0.7              |
| PTAr        | accoa.c + pi.c $\leftrightarrow$ actp.c + coa.c                                                                                              | -0.1              | -2.7        | -0.1             |
| HSOR        | 3.0 h.c + 3.0 nadph.c + so3.c $\rightarrow$ 3.0 h2o.c + h2s.c + 3.0 nadp.c                                                                   | -0.1              | -0.3        | -1.2             |
| TRDR        | h.c + nadph.c + trdox.c $\rightarrow$ nadp.c + trdrd.c                                                                                       | -0.1              | -0.3        | 0.8              |
| IGPS        | 2cpr5p.c + h.c $\rightarrow$ 3ig3p.c + co2.c + h2o.c                                                                                         | -0.1              | -0.3        | 0.2              |
| GLUDy       | glu_L.c + h2o.c + nadp.c $\leftrightarrow$ akg.c + h.c + nadph.c + nh4.c                                                                     | -0.1              | -0.5        | -0.2             |
| ECH         | 2.0 fdxr_42.c + 3.0 h.c $\leftrightarrow$ 2.0 fdxo_42.c + h2.c + h.e                                                                         | -0.1              | -15.6       | -13.5            |
| ALLAS       | 24.0 ala_D.c + 24.0 atp.c + 24.0 cdpglyc.c + dg12dg.c + 24.0 h2o.c $\rightarrow$ ala_Lta.c + 24.0 amp.c + 24.0 cmp.c + 48.0 h.c + 24.0 ppi.c | -0.1              | -0.2        | 0.0              |
| HSDxi       | aspsa.c + h.c + nadh.c $\rightarrow$ hom_L.c + nad.c                                                                                         | -0.1              | -0.3        | 0.8              |
| PRMICI      | prfp.c $\rightarrow$ prlp.c                                                                                                                  | -0.1              | -0.3        | -0.1             |
| OCBT        | cbp.c + orn_L.c $\leftrightarrow$ citr_L.c + h.c + pi.c                                                                                      | -0.2              | -0.3        | -0.3             |
| UAGCVT      | pep.c + uacgam.c $\rightarrow$ pi.c + uaccg.c                                                                                                | -0.2              | -0.3        | -0.1             |
| ANS         | chor.c + gln_L.c $\rightarrow$ anth.c + glu_L.c + h.c + pyr.c                                                                                | -0.2              | -0.3        | 0.2              |
| DHAD2       | 23dhmp.c $\rightarrow$ 3mop.c + h2o.c                                                                                                        | -0.2              | -0.3        | 0.6              |
| ASPO2y      | asp_L.c + nadp.c $\rightarrow$ h.c + iasp.c + nadph.c                                                                                        | -0.3              | -0.3        | -0.1             |
| NADK        | atp.c + nad.c $\rightarrow$ adp.c + h.c + nadp.c                                                                                             | -0.3              | -0.3        | -0.1             |
| METS        | 5mthf.c + hcys_L.c $\rightarrow$ met_L.c + thf.c                                                                                             | -0.3              | -0.3        | 0.8              |
| IMPD        | h2o.c + imp.c + nad.c $\leftrightarrow$ h.c + nadh.c + xmp.c                                                                                 | -0.3              | -0.3        | -0.3             |
| MG2abc      | atp.c + h2o.c + mg2.e $\rightarrow$ adp.c + h.c + mg2.c + pi.c                                                                               | -0.3              | -0.3        | -0.1             |
| PDHam1hi    | h.c + pyr.c + thmpp.c $\rightarrow$ 2ahethmpp.c + co2.c                                                                                      | -0.4              | -0.3        | 12.4             |
| ACAS_2ahbut | 2ahethmpp.c + 2obut.c $\rightarrow$ 2ahbut.c + thmpp.c                                                                                       | -0.4              | -0.3        | 0.6              |
| GF6PTA      | f6p_B.c + gln_L.c $\rightarrow$ gam6p.c + glu_L.c                                                                                            | -0.4              | -0.3        | 0.0              |
| CHRS        | 3psme.c $\rightarrow$ chor.c + pi.c                                                                                                          | -0.4              | -0.3        | 0.7              |
| SERH        | 3ig3p.c + ser_L.c $\rightarrow$ g3p.c + h2o.c + trp_L.c                                                                                      | -0.4              | -0.3        | 0.2              |
| ALATA_L     | akg.c + ala_L.c $\leftrightarrow$ glu_L.c + pyr.c                                                                                            | -0.5              | -0.3        | -12.9            |
| NNDPR       | h.c + prpp.c + quln.c $\rightarrow$ co2.c + nicrnt.c + ppi.c                                                                                 | -0.5              | -0.3        | -0.1             |
| TMDS        | dump.c + mlthf.c $\rightarrow$ dhf.c + dtmp.c                                                                                                | -0.5              | -0.3        | -0.1             |
| PHETA1      | akg.c + phe_L.c $\leftrightarrow$ glu_L.c + phpyr.c                                                                                          | -0.6              | -0.3        | 0.8              |
| TYRTA       | akg.c + tyr_L.c $\leftrightarrow$ 34hpp.c + glu_L.c                                                                                          | -0.6              | -0.3        | 0.6              |
| GMPS        | atp.c + nh4.c + xmp.c $\rightarrow$ amp.c + gmp.c + 3.0 h.c + ppi.c                                                                          | -0.6              | -0.3        | -0.3             |
| SKK         | atp.c + skm.c $\rightarrow$ adp.c + h.c + skm5p.c                                                                                            | -0.6              | -0.3        | 0.7              |
| ACOTA       | acorn.c + akg.c $\leftrightarrow$ acg5sa.c + glu_L.c                                                                                         | -0.6              | -0.3        | -0.3             |
| PPDK        | amp.c + 2.0 h.c + pep.c + ppi.c $\rightarrow$ atp.c + pi.c + pyr.c                                                                           | -0.7              | -10.0       | 0.1              |
| GLUPRT      | glu_L.c + h2o.c + prpp.c $\rightarrow$ glu_L.c + h.c + ppi.c + pram.c                                                                        | -0.7              | -0.3        | -0.3             |
| KARI        | 2ahbut.c $\leftrightarrow$ cpd10162.c                                                                                                        | -0.8              | -0.3        | 0.6              |
| KARI_23dhmp | 23dhmp.c + nadp.c $\leftrightarrow$ cpd10162.c + h.c + nadph.c                                                                               | -0.8              | -0.3        | 0.6              |
| ARGSL       | argsuc.c $\leftrightarrow$ arg_L.c + fum.c                                                                                                   | -0.8              | -0.3        | -0.3             |

| ID     | Formula                                                                      | Fold change       |             |                  |
|--------|------------------------------------------------------------------------------|-------------------|-------------|------------------|
|        |                                                                              | <i>proteomics</i> | <i>pFBA</i> | <i>FVAcenter</i> |
| LEUTA  | 4mop_c + glu_L_c → akg_c + leu_L_c                                           | -0.8              | -0.3        | 0.4              |
| ILETA  | akg_c + ile_L_c ↔ 3mop_c + glu_L_c                                           | -0.8              | -0.3        | 0.6              |
| VALTA  | akg_c + val_L_c ↔ 3mob_c + glu_L_c                                           | -0.8              | -1.4        | -1.5             |
| ARGSS  | asp_L_c + atp_c + citr_L_c ↔ amp_c + argsuc_c + 2.0 h_c + ppi_c              | -0.8              | -0.3        | -0.3             |
| SHSL2  | h2s_c + suchms_c → hcys_L_c + succ_c                                         | -0.9              | -6.0        | 0.8              |
| AHSL   | achms_c + cys_L_c ↔ ac_c + cyst_L_c + h_c                                    | -0.9              | -10.6       | -0.3             |
| SHSL1  | cyst_L_c + h_c + succ_c ↔ cys_L_c + suchms_c                                 | -0.9              | -10.6       | 0.4              |
| ACKr   | actp_c + adp_c → ac_c + atp_c                                                | -0.9              | -2.7        | -0.1             |
| QULNS  | dhap_c + iasp_c → 2.0 h2o_c + h_c + pi_c + quln_c                            | -0.9              | -0.3        | -0.1             |
| NADS2  | atp_c + dnad_c + gln_L_c + h2o_c → amp_c + glu_L_c + 2.0 h_c + nad_c + ppi_c | -0.9              | -0.3        | -0.1             |
| FE3abc | atp_c + fe3_e + h2o_c → adp_c + fe3_c + h_c + pi_c                           | -1.0              | -0.3        | -0.1             |
| ASPTA  | akg_c + asp_L_c ↔ glu_L_c + oaa_c                                            | -1.0              | -0.3        | 0.2              |
| CTPS1  | atp_c + nh4_c + utp_c → adp_c + ctp_c + 2.0 h_c + pi_c                       | -1.2              | -0.3        | 0.0              |
| ACGK   | acglu_c + atp_c → acg5p_c + adp_c                                            | -1.2              | -0.3        | -0.3             |
| IGPDH  | eig3p_c → h2o_c + imaep_c                                                    | -1.2              | -0.3        | -0.1             |
| AGPR   | acg5sa_c + nadp_c + pi_c ↔ acg5p_c + h_c + nadph_c                           | -1.3              | -0.3        | -0.3             |
| PHEt2r | h_e + phe_L_e ↔ h_c + phe_L_c                                                | -1.5              | -0.3        | 0.8              |
| UAG4Ei | uacgam_c → udpacgal_c                                                        | -1.5              | -0.3        | -0.1             |
| CYSS   | acser_c + h2s_c → ac_c + cys_L_c                                             | -1.8              | -0.3        | -0.5             |
| BIF    | 2.0 fdxr_42_c + 3.0 h_c + nadh_c ↔ 2.0 fdxo_42_c + 2.0 h2_c + nad_c          | -1.8              | -13.8       | -12.5            |
| UMPk   | atp_c + h_c + ump_c → adp_c + udp_c                                          | -2.1              | -0.3        | 0.0              |
| SULabc | atp_c + h2o_c + so4_e → adp_c + h_c + pi_c + so4_c                           | -4.6              | -0.3        | 0.8              |

Table S2: The pFBA-simulated fluxes from the  $\Delta hydG\Delta ech$  case study. In the table, we only presented reactions involving NADPH or exchange reactions that have different fluxes between the wild-type and mutant. We did not present the biomass reaction due to size as well as the reactions with the same fold change magnitude as the biomass reaction ( $|FC| = 0.26$ ), likely because they are fully correlated.

| ID          | Formula                                                                                         | Fluxes (mmol/gCDW/hr) |             |        |
|-------------|-------------------------------------------------------------------------------------------------|-----------------------|-------------|--------|
|             |                                                                                                 | <i>W.T.</i>           | <i>Mut.</i> | FC     |
| EX_ibutoh_e | ibutoh_e $\rightarrow$                                                                          | 0.0                   | 0.49        | 12.26  |
| KARA1       | alac_S_c + h_c + nadph_c $\rightarrow$ 23dhmb_c + nadp_c                                        | 0.22                  | 0.59        | 1.42   |
| EX_etoh_e   | etoh_e $\rightarrow$                                                                            | 1.09                  | 1.88        | 0.78   |
| EX_h2o_e    | h2o_e $\leftrightarrow$                                                                         | -0.38                 | 0.5         | 0.42   |
| EX_co2_e    | co2_e $\rightarrow$                                                                             | 2.07                  | 2.77        | 0.42   |
| ME2         | mal_L_c + nadp_c $\rightarrow$ co2_c + nadph_c + pyr_c                                          | 2.9                   | 3.51        | 0.28   |
| EX_for_e    | for_e $\rightarrow$                                                                             | 0.48                  | 0.56        | 0.23   |
| FRNDPR2r    | 2.0 fdxr_42_c + h_c + nadh_c + 2.0 nadp_c $\leftrightarrow$ 2.0 fdxo_42_c + nad_c + 2.0 nadph_c | -1.02                 | -1.17       | 0.2    |
| EX_nh4_e    | nh4_e $\leftrightarrow$                                                                         | -0.73                 | -0.53       | -0.48  |
| GLUDy       | glu_L_c + h2o_c + nadp_c $\leftrightarrow$ akg_c + h_c + nadph_c + nh4_c                        | -0.61                 | -0.42       | -0.53  |
| EX_h_e      | h_e $\leftrightarrow$                                                                           | 2.93                  | 1.19        | -1.3   |
| EX_val_L_e  | val_L_e $\rightarrow$                                                                           | 0.18                  | 0.06        | -1.54  |
| ICDHyr      | icit_c + nadp_c $\rightarrow$ akg_c + co2_c + nadph_c                                           | 0.21                  | 0.04        | -2.27  |
| EX_ac_e     | ac_e $\rightarrow$                                                                              | 0.93                  | 0.17        | -2.46  |
| EX_lac_L_e  | lac_L_e $\rightarrow$                                                                           | 0.05                  | 0.01        | -2.49  |
| EX_succ_e   | succ_e $\rightarrow$                                                                            | 0.41                  | 0.0         | -12.01 |
| EX_h2_e     | h2_e $\rightarrow$                                                                              | 2.2                   | 0.0         | -14.43 |
